# Supplementary material for: Liquid photonic crystal detection reagent for reliable sensing of Cu2+ in water
Source: Royal Society of Chemistry journal article supplement (doi:10.1039/d0ra01014f), 2020-01-01
Supplement: d0ra01014f1.pdf [file d0ra01014f1.pdf]

## Supporting Information

# Liquid Photonic Crystal Detection Reagent for Reliable Sensing of $\text{Cu}^{2+}$ in Water

*Yixin Zhang and Jianping Ge\**

School of Chemistry and Molecular Engineering, Shanghai Key Laboratory of Green Chemistry and Chemical Processes, East China Normal University, Shanghai, 200062, China.  
E-mail: [jpge@chem.ecnu.edu.cn](mailto:jpge@chem.ecnu.edu.cn)

### Contents

|                                                                                                      |      |
|------------------------------------------------------------------------------------------------------|------|
| 1. OM and SEM images of liquid PCs .....                                                             | S-2  |
| 2. Influence of the introduction of Sal upon reflection signals .....                                | S-3  |
| 3. Influence of the introduction of $\text{Cu}^{2+}$ upon reflection signals.....                    | S-3  |
| 4. Response of Liquid PC detection reagents with different particle volume fraction.....             | S-4  |
| 5. Reproducibility for liquid PC detection reagents prepared in different batches.....               | S-5  |
| 6. Reproducibility for liquid PC detection reagents prepared by different $\text{SiO}_2$ particles.. | S-6  |
| 7. Reproducibility for liquid PC detection reagents used in 5 days.....                              | S-7  |
| 8. Reproducibility for liquid PC detection reagents used at different humidities.....                | S-8  |
| 9. Chemical composition of liquid PC detection reagents .....                                        | S-9  |
| 10. Formation constants of metal-salicylic acid complex .....                                        | S-11 |
| 11. Disassociation of Sal promoted by metal cation in aqueous and non-aqueous solution.              | S-11 |

## 1. OM and SEM images of liquid PCs.

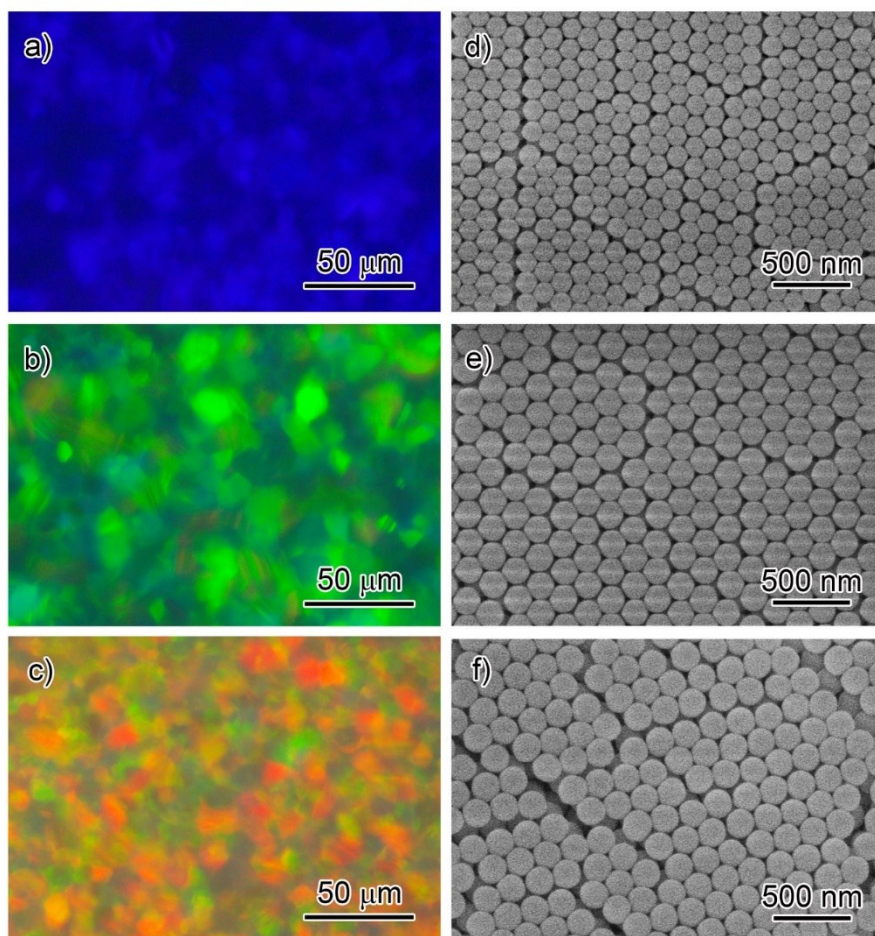

**Figure S1.** Optical microscope images and scanning electron microscope images of liquid colloidal photonic crystals with a, d) blue, b, e) green, and c, f) red structural colors.

## 2. Influence of the introduction of Sal upon reflection signals.

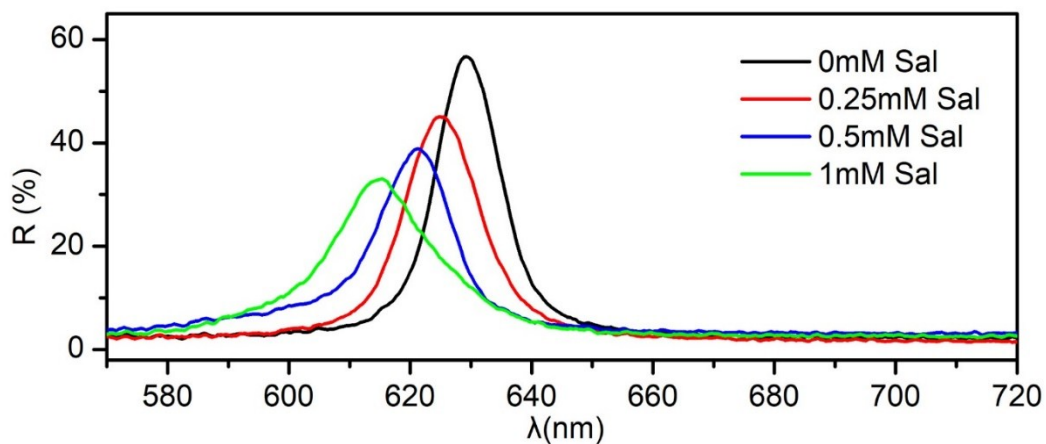

**Figure S2.** Reflection spectra of liquid photonic crystal after introducing Sal with different concentrations.

## 3. Influence of the introduction of $\text{Cu}^{2+}$ upon reflection signals.

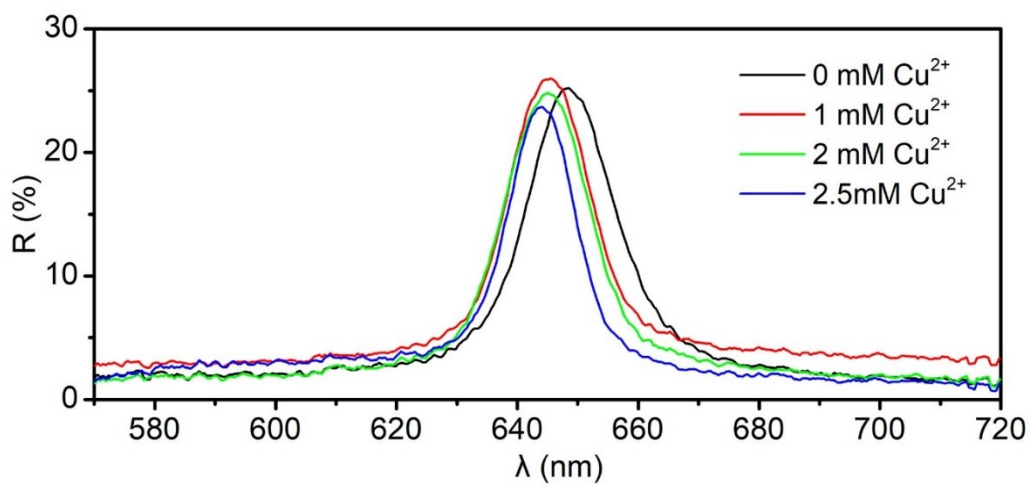

**Figure S3.** Reflection spectra of liquid photonic crystal (without Sal) after introducing the aqueous solution of  $\text{Cu}^{2+}$ .

#### 4. Response of Liquid PC detection reagents with different particle volume fraction.

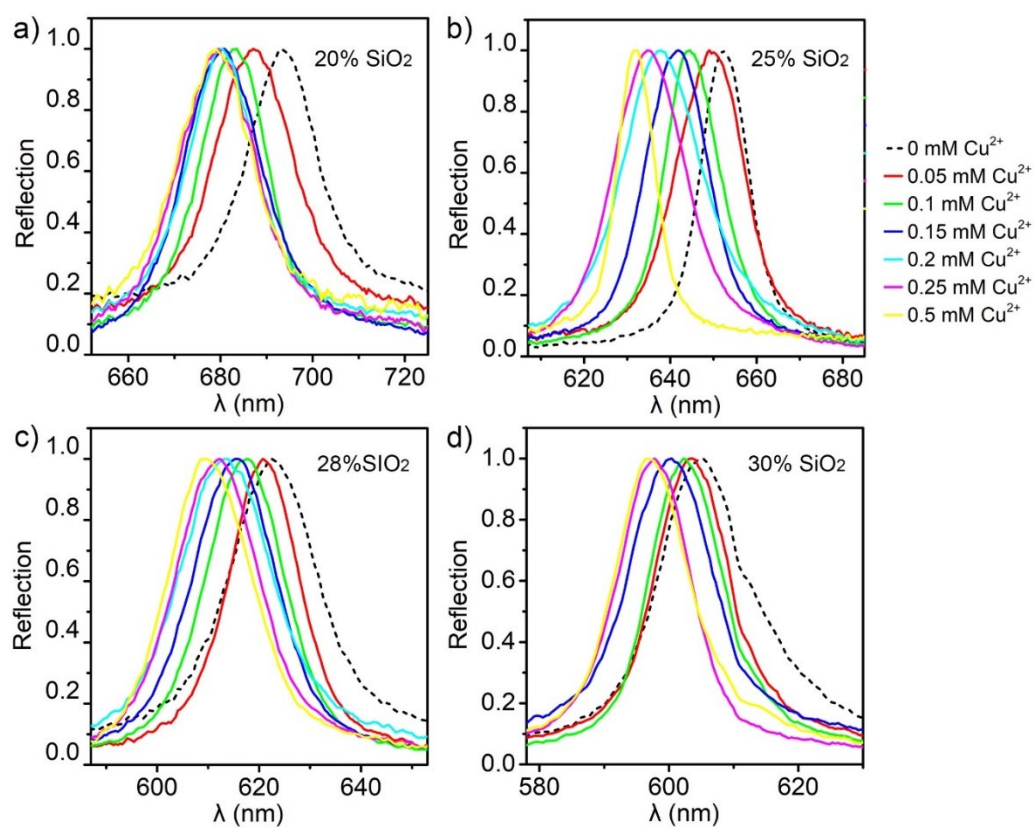

**Figure S4.** Reflection change of liquid photonic crystals with particle volume fraction of a) 20%, b) 25%, c) 28%, and d) 30% after mixing with aqueous solution of Cu<sup>2+</sup>.

**5. Reproducibility of optical response for liquid PC detection reagents prepared in different batches.**

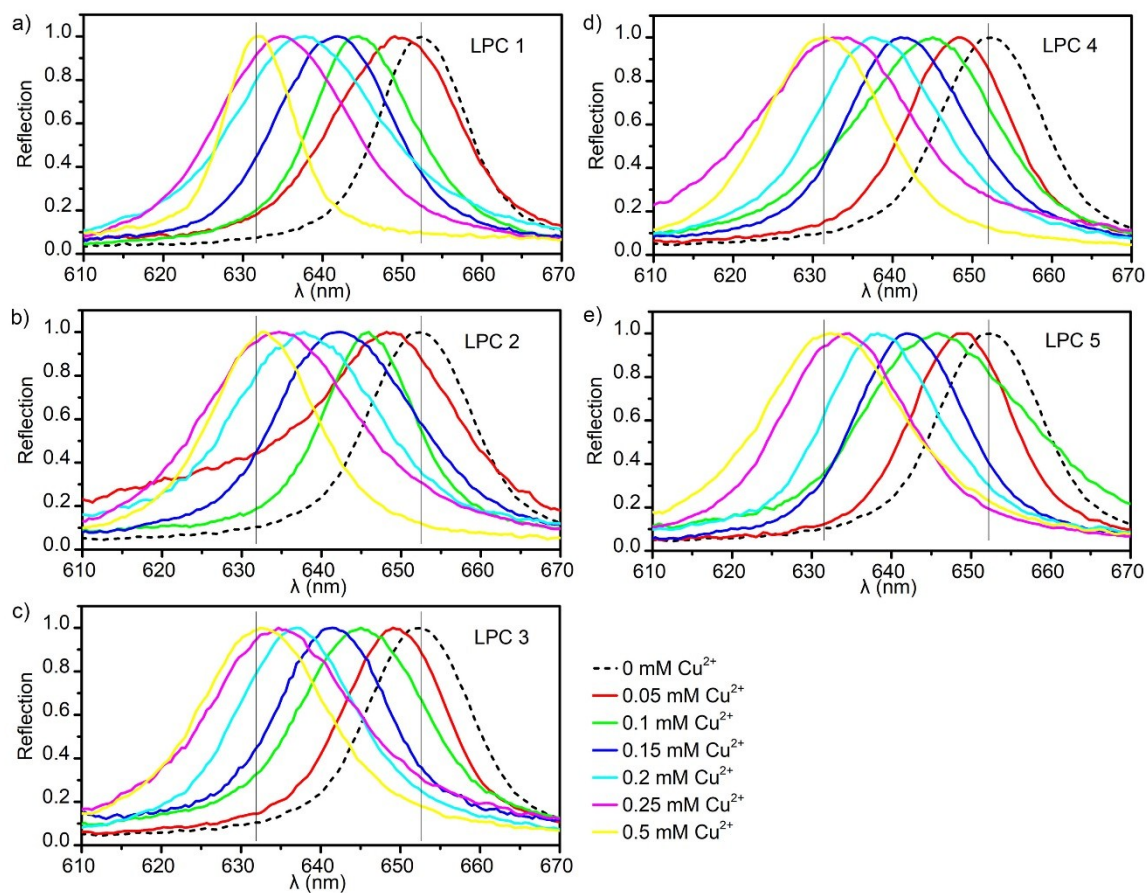

**Figure S5.** Optical response of same liquid PC detection reagents but prepared in different batches to the aqueous solution of  $\text{Cu}^{2+}$ .

6. Reproducibility of optical response for liquid PC detection reagents prepared by different SiO<sub>2</sub> particles.

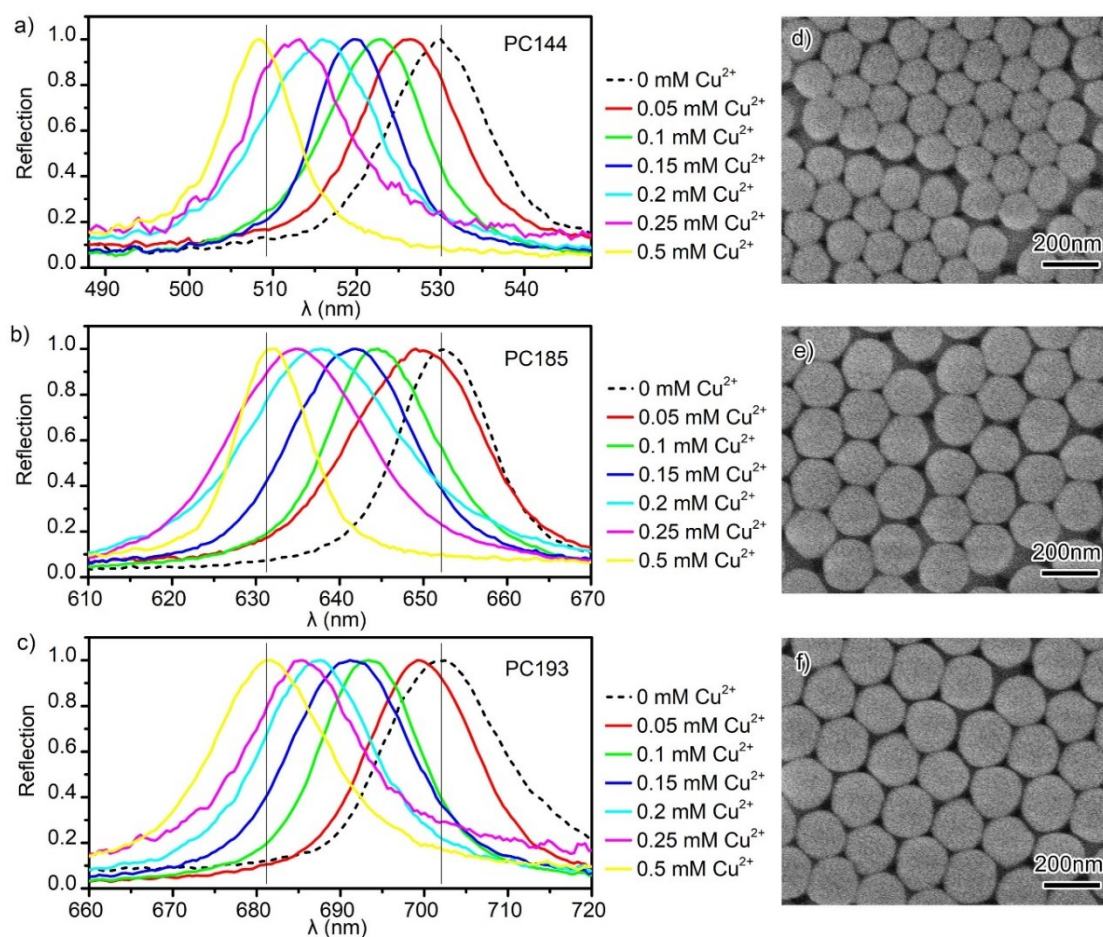

**Figure S6.** Optical response of liquid PC detection reagents prepared by SiO<sub>2</sub> particles with different sizes to the aqueous solution of Cu<sup>2+</sup>.

## 7. Reproducibility of optical response for liquid PC detection reagents used in 5 days

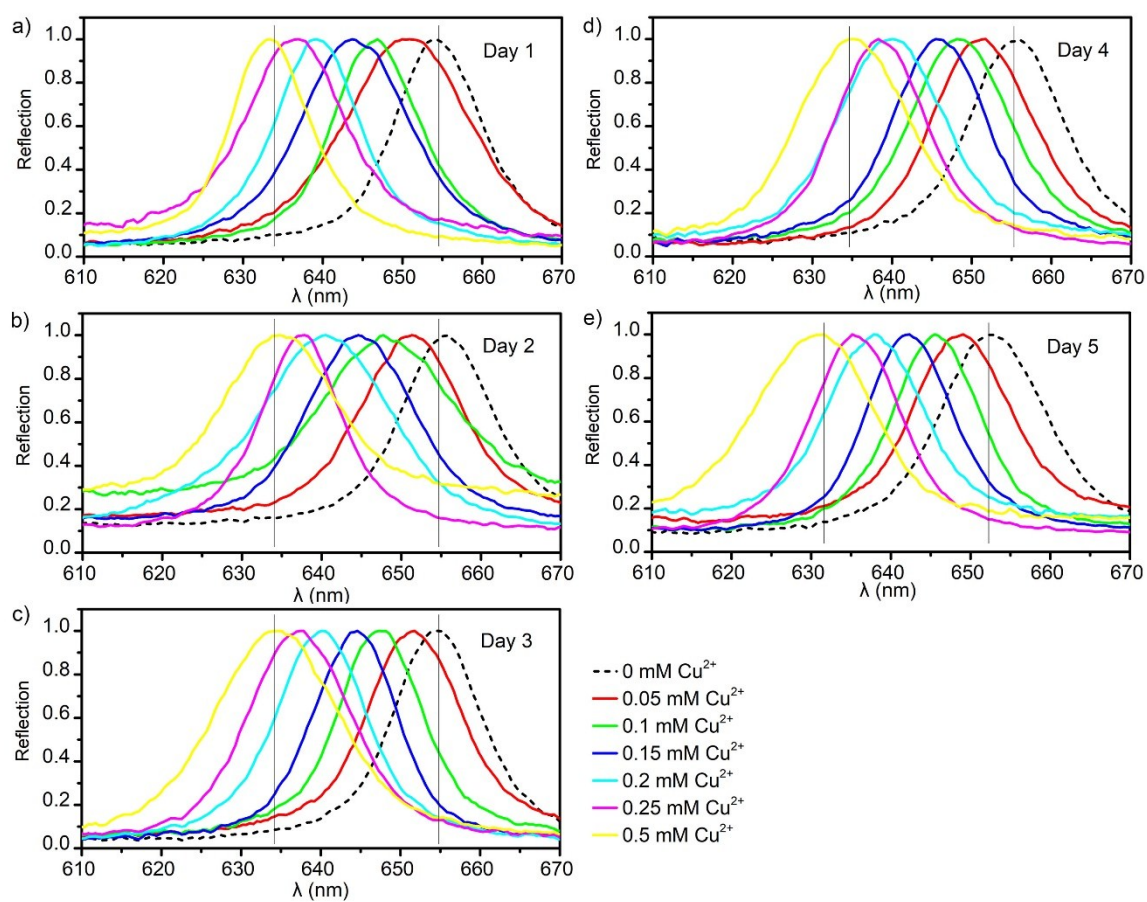

**Figure S7.** Optical response of the same liquid PC detection reagents to the aqueous solution of  $\text{Cu}^{2+}$  in 5 continuous days.

## 8. Reproducibility of optical response for liquid PC detection reagents used at different humidities.

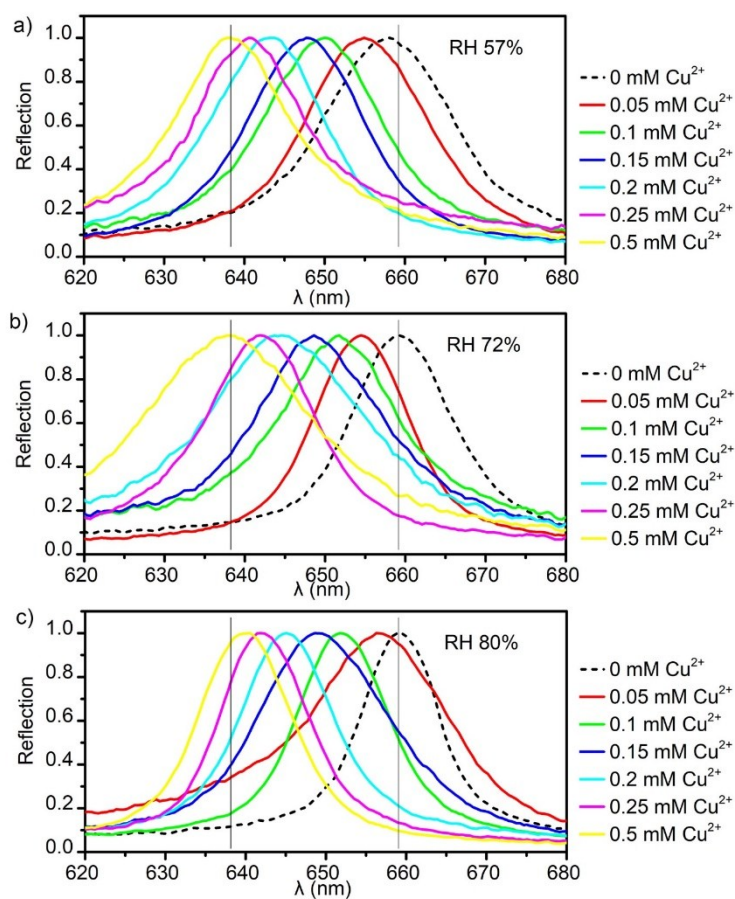

**Figure S8.** Optical response of the same liquid PC detection reagent to the aqueous solution of  $\text{Cu}^{2+}$  at different humidities.



## 9. Chemical composition of liquid PC detection reagents.

**Table S1.** The volume, concentration, and chemical composition of liquid PC detection reagents and aqueous solution of  $\text{Cu}^{2+}$  used in this work.

| Sample | $f_{\text{SiO}_2}$<br>(%) | $d_{\text{SiO}_2}$<br>(nm) | $C_{\text{Sal}}$<br>(mM) | Solvent<br>( $\mu\text{L}$ ) | $V_{\text{LPC}}$<br>( $\mu\text{L}$ ) | $C_{\text{Metal ions}}$<br>(mM)                                          | $V_{\text{H}_2\text{O}}$<br>( $\mu\text{L}$ ) | Citation in<br>this work |
|--------|---------------------------|----------------------------|--------------------------|------------------------------|---------------------------------------|--------------------------------------------------------------------------|-----------------------------------------------|--------------------------|
| 1      | 30                        | 140                        | 0                        | 70/PC                        | 100                                   | 0                                                                        | 0                                             | Fig 1a,1b<br>Fig S1      |
| 2      | 30                        | 174                        | 0                        | 70/PC                        | 100                                   | 0                                                                        | 0                                             | Fig 1a,1b<br>Fig S1      |
| 3      | 30                        | 185                        | 0                        | 70/PC                        | 100                                   | 0                                                                        | 0                                             | Fig 1a,1b<br>Fig S1      |
| 4      | 30                        | 180                        | 0                        | 70/EG                        | 100                                   | 0                                                                        | 0                                             | Fig 1c-h                 |
| 5      | 25                        | 185                        | 1                        | 75/PC                        | 100                                   | 0, 0.05, 0.1, 0.5<br>$\text{Cu}^{2+}$                                    | 10                                            | Fig 2d                   |
| 6      | 25                        | 185                        | 0,0.25,<br>0.5,1         | 75/PC                        | 100                                   | 0                                                                        | 0                                             | Fig S2                   |
| 7      | 25                        | 185                        | 0                        | 75/PC                        | 100                                   | 0, 1, 2, 2.5 $\text{Cu}^{2+}$                                            | 10                                            | Fig S3                   |
| 8      | 25                        | 185                        | 0.05                     | 75/PC                        | 100                                   | 0, 0.01, 0.02,<br>0.04, 0.06,<br>0.08, 0.1 $\text{Cu}^{2+}$              | 10                                            | Fig 4a,<br>Fig 5a        |
| 9      | 25                        | 185                        | 0.1                      | 75/PC                        | 100                                   | 0, 0.01, 0.02,<br>0.05, 0.1, 0.15,<br>0.2, 0.25, 0.3<br>$\text{Cu}^{2+}$ | 10                                            | Fig 4b,<br>Fig 5b        |
| 10     | 25                        | 185                        | 0.25                     | 75/PC                        | 100                                   | 0, 0.05, 0.1,<br>0.15, 0.2, 0.25,<br>0.5 $\text{Cu}^{2+}$                | 10                                            | Fig 4c,<br>Fig 5c        |
| 11     | 25                        | 185                        | 0.5                      | 75/PC                        | 100                                   | 0, 0.05, 0.1,<br>0.15, 0.2, 0.25,<br>0.5, 0.75 $\text{Cu}^{2+}$          | 10                                            | Fig 4d,<br>Fig 5d        |
| 12     | 20                        | 185                        | 0.25                     | 80/PC                        | 100                                   | 0, 0.05, 0.1,<br>0.15, 0.2, 0.25,<br>0.5 $\text{Cu}^{2+}$                | 10                                            | Fig 6a,<br>Fig S4a       |
| 10     | 25                        | 185                        | 0.25                     | 75/PC                        | 100                                   | 0, 0.05, 0.1,<br>0.15, 0.2, 0.25,<br>0.5 $\text{Cu}^{2+}$                | 10                                            | Fig 6b,<br>Fig S4b       |
| 13     | 28                        | 185                        | 0.25                     | 72/PC                        | 100                                   | 0, 0.05, 0.1,<br>0.15, 0.2, 0.25,<br>0.5 $\text{Cu}^{2+}$                | 10                                            | Fig 6c,<br>Fig S4c       |

|    |    |     |      |       |     |                                                                                                                                                                                                             |    |                            |
|----|----|-----|------|-------|-----|-------------------------------------------------------------------------------------------------------------------------------------------------------------------------------------------------------------|----|----------------------------|
| 14 | 30 | 185 | 0.25 | 70/PC | 100 | 0, 0.05, 0.1,<br>0.15, 0.2, 0.5<br>Cu <sup>2+</sup>                                                                                                                                                         | 10 | Fig 6d,<br>Fig S4d         |
| 15 | 25 | 185 | 0.25 | 75/PC | 100 | 0.5 Cu <sup>2+</sup> , Al <sup>3+</sup> ,<br>Cd <sup>2+</sup> , Co <sup>2+</sup> ,<br>Cr <sup>3+</sup> , Fe <sup>3+</sup> ,<br>Mg <sup>2+</sup> , Ni <sup>2+</sup> ,<br>Pb <sup>2+</sup> , Zn <sup>2+</sup> | 10 | Fig 7a-c                   |
| 16 | 25 | 185 | 0.25 | 75/PC | 100 | 0.5 Cu <sup>2+</sup> ,<br>0.5 Cu <sup>2+</sup> +0.5<br>Zn <sup>2+</sup> ,<br>0.5 Cu <sup>2+</sup> +0.5<br>Zn <sup>2+</sup> +0.5 Ni <sup>2+</sup>                                                            | 10 | Fig 7d                     |
| 10 | 25 | 185 | 0.25 | 75/PC | 100 | 0, 0.05, 0.1,<br>0.15, 0.2, 0.25,<br>0.5 Cu <sup>2+</sup>                                                                                                                                                   | 10 | Fig 8a,<br>Fig S5a         |
| 17 | 25 | 185 | 0.25 | 75/PC | 100 | 0, 0.05, 0.1,<br>0.15, 0.2, 0.25,<br>0.5 Cu <sup>2+</sup>                                                                                                                                                   | 10 | Fig 8a,<br>Fig S5b         |
| 18 | 25 | 185 | 0.25 | 75/PC | 100 | 0, 0.05, 0.1,<br>0.15, 0.2, 0.25,<br>0.5 Cu <sup>2+</sup>                                                                                                                                                   | 10 | Fig 8a,<br>Fig S5c         |
| 19 | 25 | 185 | 0.25 | 75/PC | 100 | 0, 0.05, 0.1,<br>0.15, 0.2, 0.25,<br>0.5 Cu <sup>2+</sup>                                                                                                                                                   | 10 | Fig 8a,<br>Fig S5d         |
| 20 | 25 | 185 | 0.25 | 75/PC | 100 | 0, 0.05, 0.1,<br>0.15, 0.2, 0.25,<br>0.5 Cu <sup>2+</sup>                                                                                                                                                   | 10 | Fig 8a,<br>Fig S5e         |
| 21 | 25 | 144 | 0.25 | 75/PC | 100 | 0, 0.05, 0.1,<br>0.15, 0.2, 0.25,<br>0.5 Cu <sup>2+</sup>                                                                                                                                                   | 10 | Fig 8b,<br>Fig S6a,<br>S6d |
| 10 | 25 | 185 | 0.25 | 75/PC | 100 | 0, 0.05, 0.1,<br>0.15, 0.2, 0.25,<br>0.5 Cu <sup>2+</sup>                                                                                                                                                   | 10 | Fig 8b,<br>Fig S6b,<br>S6e |
| 22 | 25 | 193 | 0.25 | 75/PC | 100 | 0, 0.05, 0.1,<br>0.15, 0.2, 0.25,<br>0.5 Cu <sup>2+</sup>                                                                                                                                                   | 10 | Fig 8b,<br>Fig S6c,<br>S6f |
| 23 | 25 | 185 | 0.25 | 75/PC | 100 | 0, 0.05, 0.1,<br>0.15, 0.2, 0.25,<br>0.5 Cu <sup>2+</sup>                                                                                                                                                   | 10 | Fig 8c,<br>Fig S7a         |
| 24 | 25 | 185 | 0.25 | 75/PC | 100 | 0, 0.05, 0.1,<br>0.15, 0.2, 0.25,<br>0.5 Cu <sup>2+</sup>                                                                                                                                                   | 10 | Fig 8c,<br>Fig S7b         |
| 25 | 25 | 185 | 0.25 | 75/PC | 100 | 0, 0.05, 0.1,                                                                                                                                                                                               | 10 | Fig 8c,                    |

|    |    |     |      |       |     |                                                           |    |                    |
|----|----|-----|------|-------|-----|-----------------------------------------------------------|----|--------------------|
|    |    |     |      |       |     | 0.15, 0.2, 0.25,<br>0.5 Cu <sup>2+</sup>                  |    | Fig S7c            |
| 26 | 25 | 185 | 0.25 | 75/PC | 100 | 0, 0.05, 0.1,<br>0.15, 0.2, 0.25,<br>0.5 Cu <sup>2+</sup> | 10 | Fig 8c,<br>Fig S7d |
| 27 | 25 | 185 | 0.25 | 75/PC | 100 | 0, 0.05, 0.1,<br>0.15, 0.2, 0.25,<br>0.5 Cu <sup>2+</sup> | 10 | Fig 8c,<br>Fig S7e |
| 28 | 25 | 185 | 0.25 | 75/PC | 100 | 0, 0.05, 0.1,<br>0.15, 0.2, 0.25,<br>0.5 Cu <sup>2+</sup> | 10 | Fig 8d,<br>Fig S8a |
| 29 | 25 | 185 | 0.25 | 75/PC | 100 | 0, 0.05, 0.1,<br>0.15, 0.2, 0.25,<br>0.5 Cu <sup>2+</sup> | 10 | Fig 8d,<br>Fig S8b |
| 30 | 25 | 185 | 0.25 | 75/PC | 100 | 0, 0.05, 0.1,<br>0.15, 0.2, 0.25,<br>0.5 Cu <sup>2+</sup> | 10 | Fig 8d,<br>Fig S8c |

## 10. Formation constants of metal-salicylic acid complex.

**Table S2.** Formation constants of metal-salicylic acid complex

|                  | Cu <sup>2+</sup> | Al <sup>3+</sup> | Cd <sup>2+</sup> | Co <sup>2+</sup> | Cr <sup>3+</sup> | Fe <sup>3+</sup> | Mg <sup>2+</sup> | Ni <sup>2+</sup> | Pb <sup>2+</sup> | Zn <sup>2+</sup> |
|------------------|------------------|------------------|------------------|------------------|------------------|------------------|------------------|------------------|------------------|------------------|
| lgK <sub>1</sub> | 10.60            | 14.11            | 5.55             | 6.72             | 8.4              | 16.48            | 4.7              | 6.95             |                  | 6.85             |
| lgK <sub>2</sub> | 18.45            | /                | /                | 11.42            | 15.3             | 28.12            | /                | 11.75            |                  | /                |

## 11. Disassociation of Sal promoted by metal cation in aqueous and non-aqueous solution.

**Table S3.** pH value of water-included Sal solution<sup>1</sup> and non-aqueous Sal solution<sup>2</sup> containing 0.5 mM of Cu<sup>2+</sup>, Fe<sup>3+</sup>, Al<sup>3+</sup>.

|                | Cu <sup>2+</sup> | Fe <sup>3+</sup> | Al <sup>3+</sup> |
|----------------|------------------|------------------|------------------|
| Sal Solution 1 | 4.69             | 3.28             | 3.65             |
| Sal Solution 2 | 2.96             | 4.87             | 4.67             |

<sup>1</sup> Sal solution: EtOH 29.2%, propylene carbonate 62.5%, H<sub>2</sub>O 8.3%; C<sub>Sal</sub> = 0.25 mM; C<sub>M+</sub> = 0.5 mM

<sup>2</sup> Sal solution: EtOH 0.55%, propylene carbonate 98.9%, H<sub>2</sub>O 0.56%; C<sub>Sal</sub> = 0.25 mM; C<sub>M+</sub> = 0.5 mM
